# Supplementary material
Source: PubMed Central journal article supplement (PMC9089372)
Supplement: NIHMS1796504-supplement-1.pdf [file NIHMS1796504-supplement-1.pdf]

**Supplemental information**

**Replication gaps are a key determinant of PARP  
inhibitor synthetic lethality with BRCA deficiency**

**Ke Cong, Min Peng, Arne Nedergaard Kousholt, Wei Ting C. Lee, Silviana Lee, Sumeet Nayak, John Kraus, Pamela S. VanderVere-Carozza, Katherine S. Pawelczak, Jennifer Calvo, Nicholas J. Panzarino, John J. Turchi, Neil Johnson, Jos Jonkers, Eli Rothenberg, and Sharon B. Cantor**

Figure S1

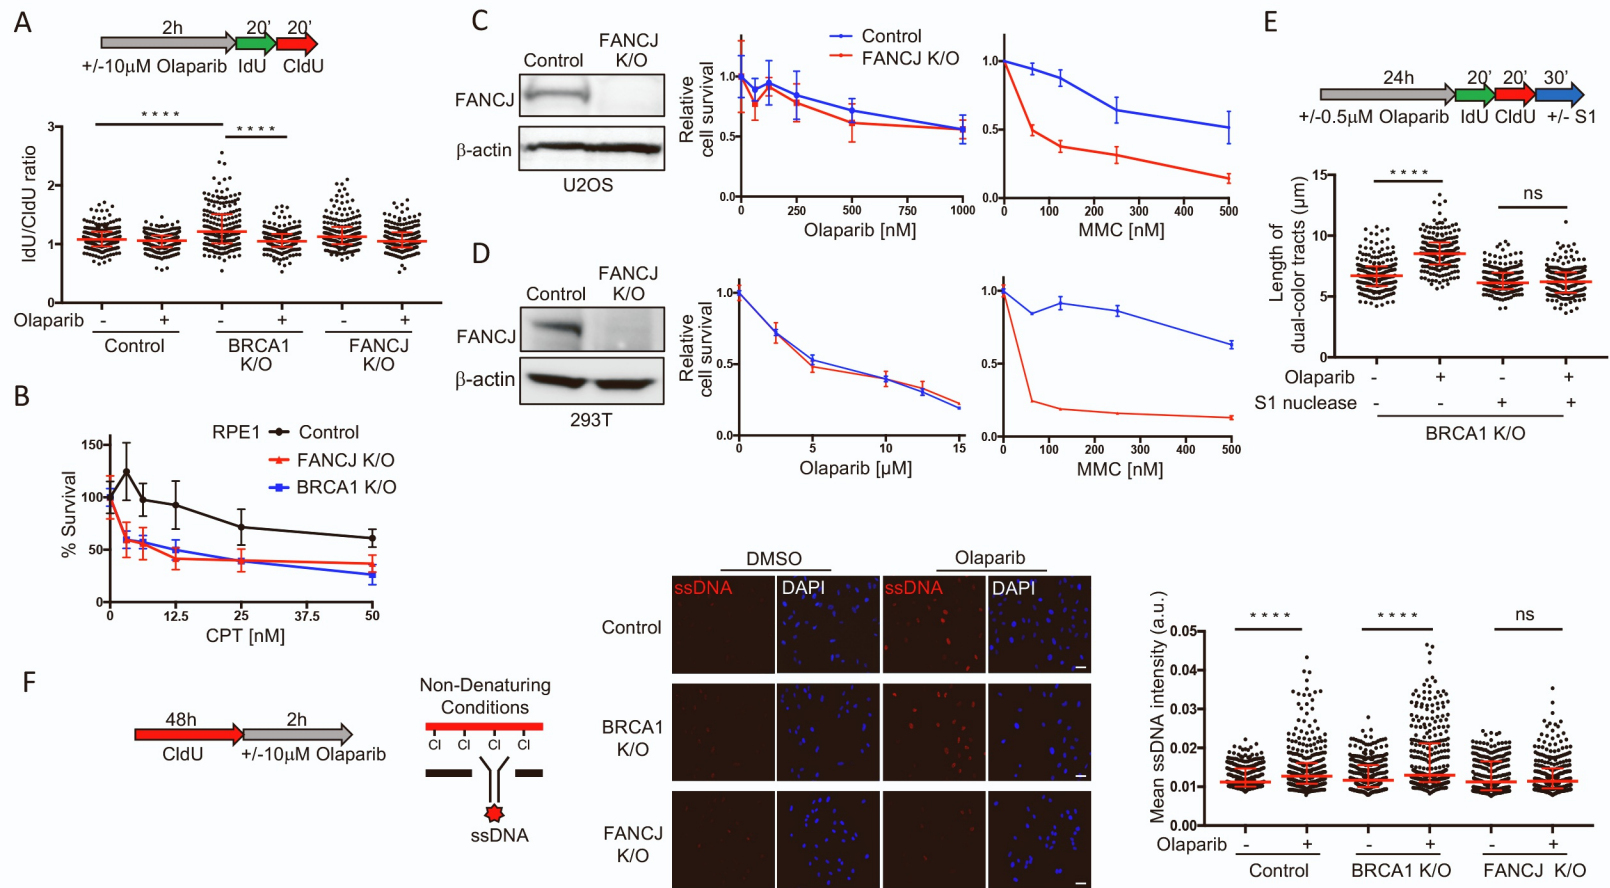

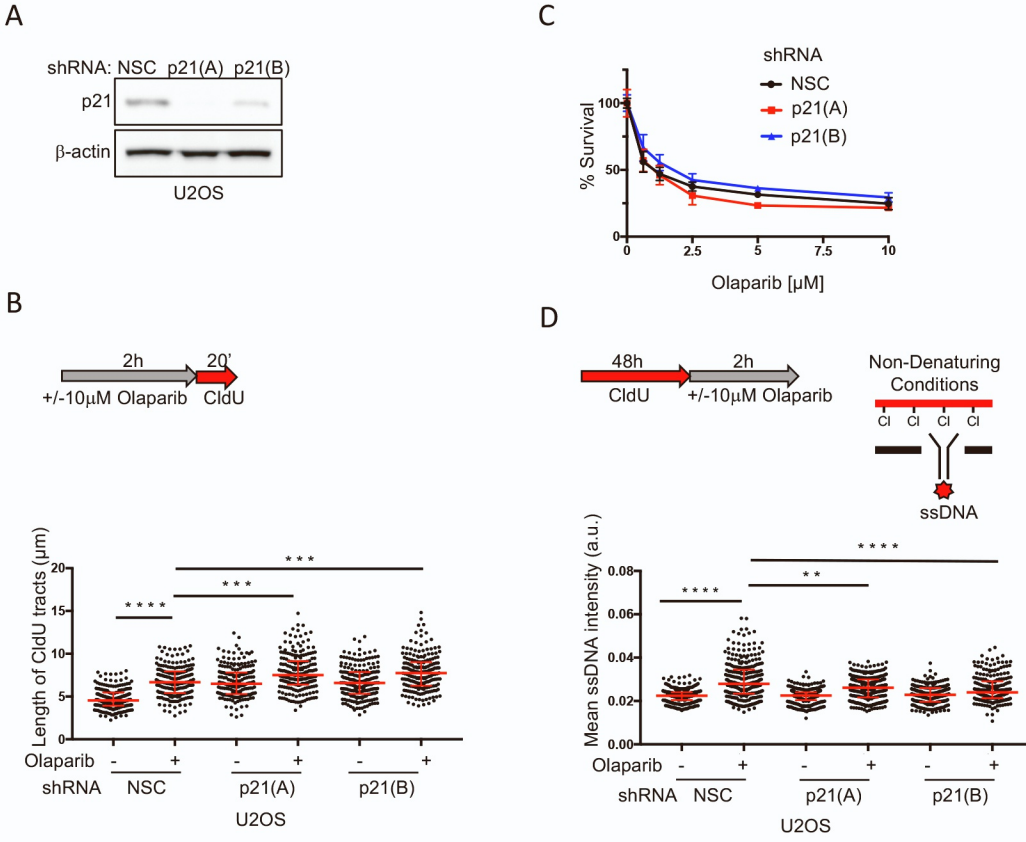

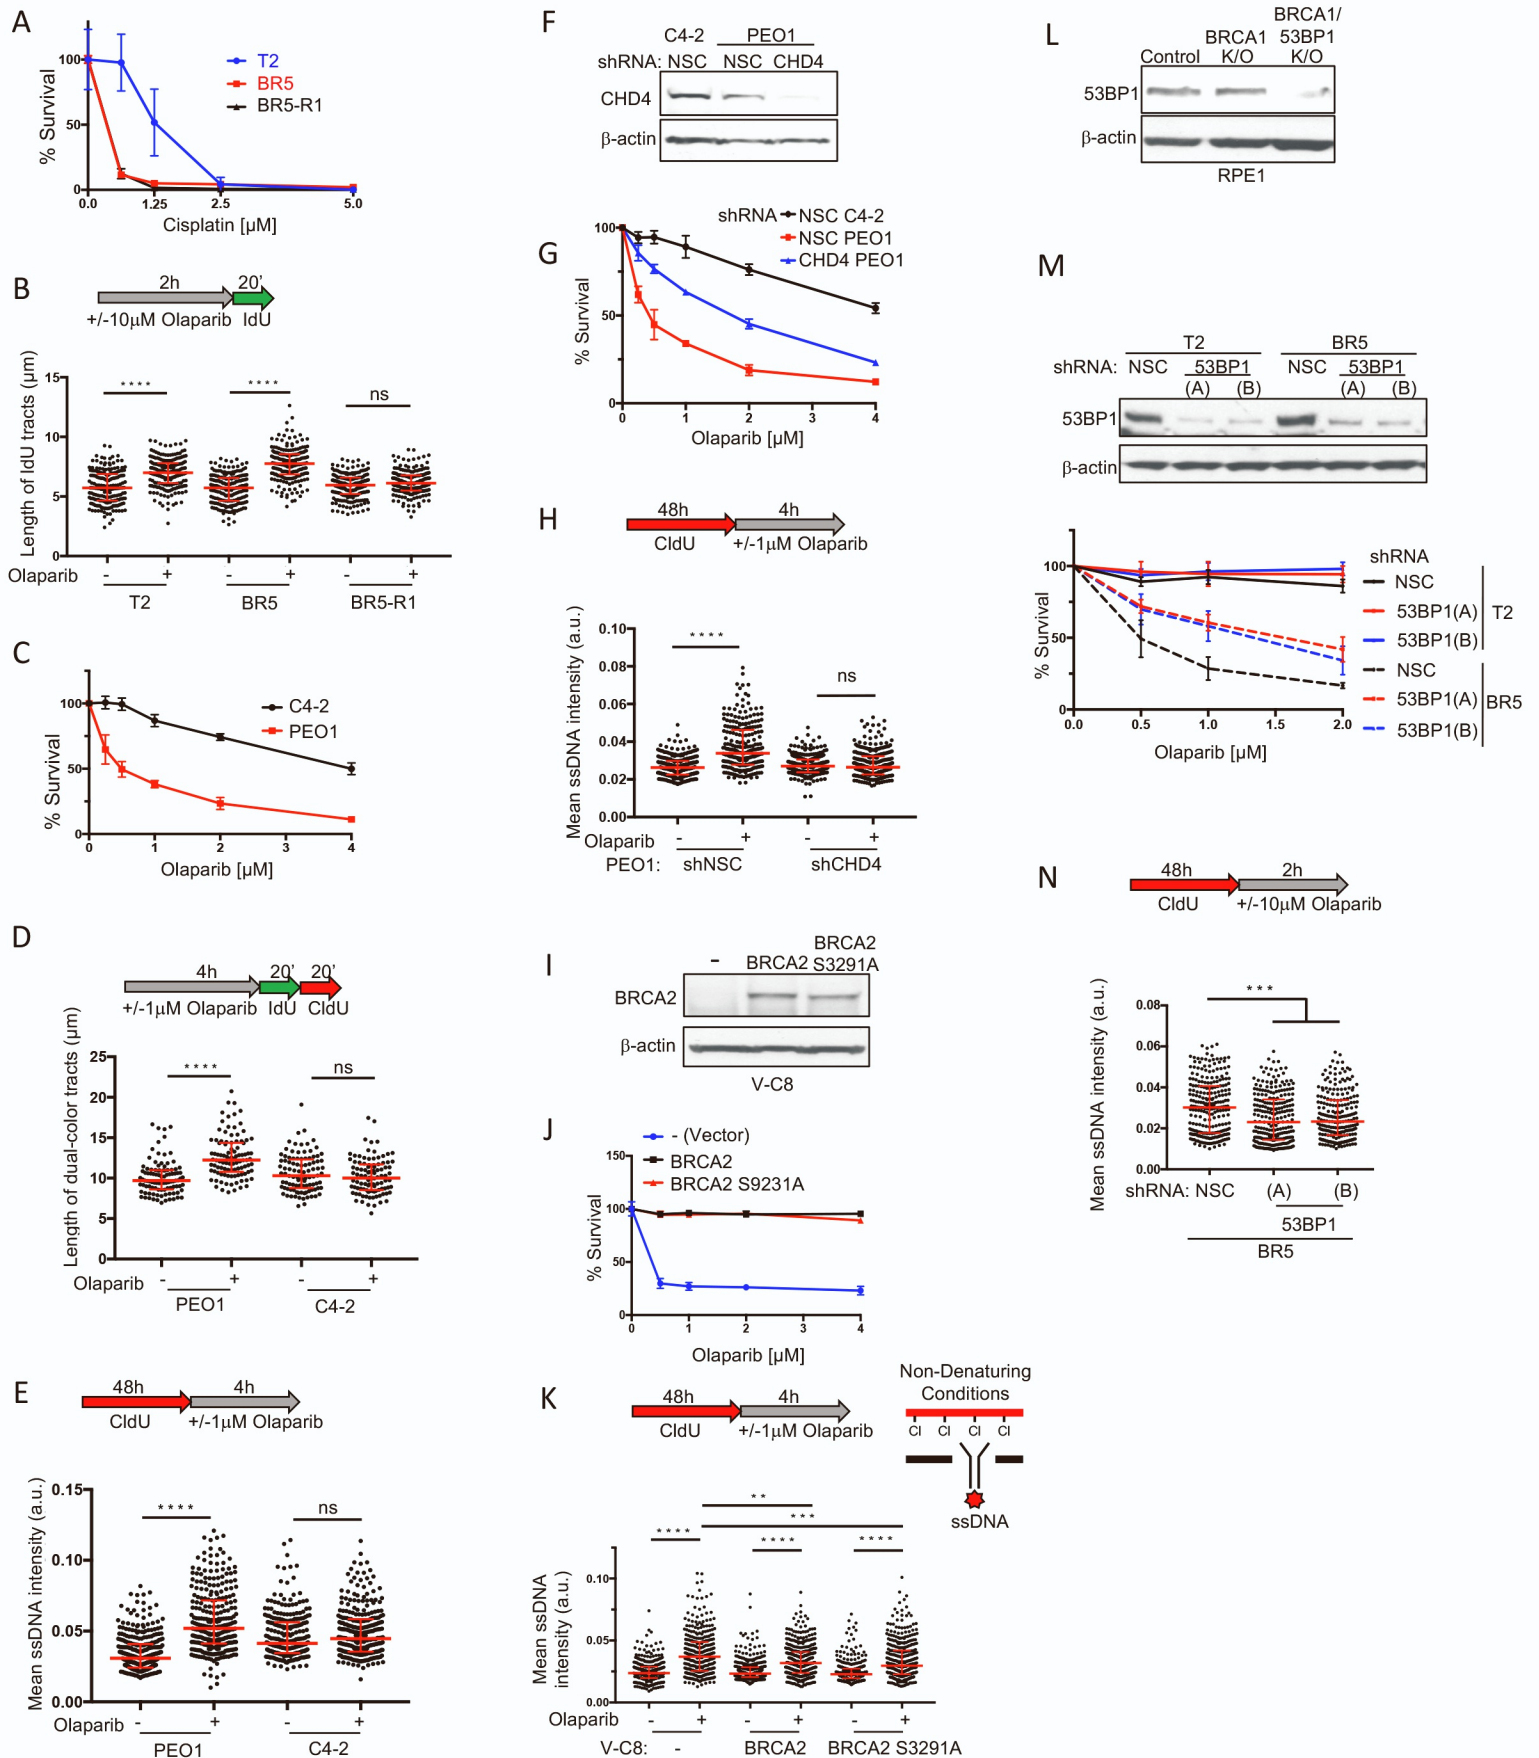

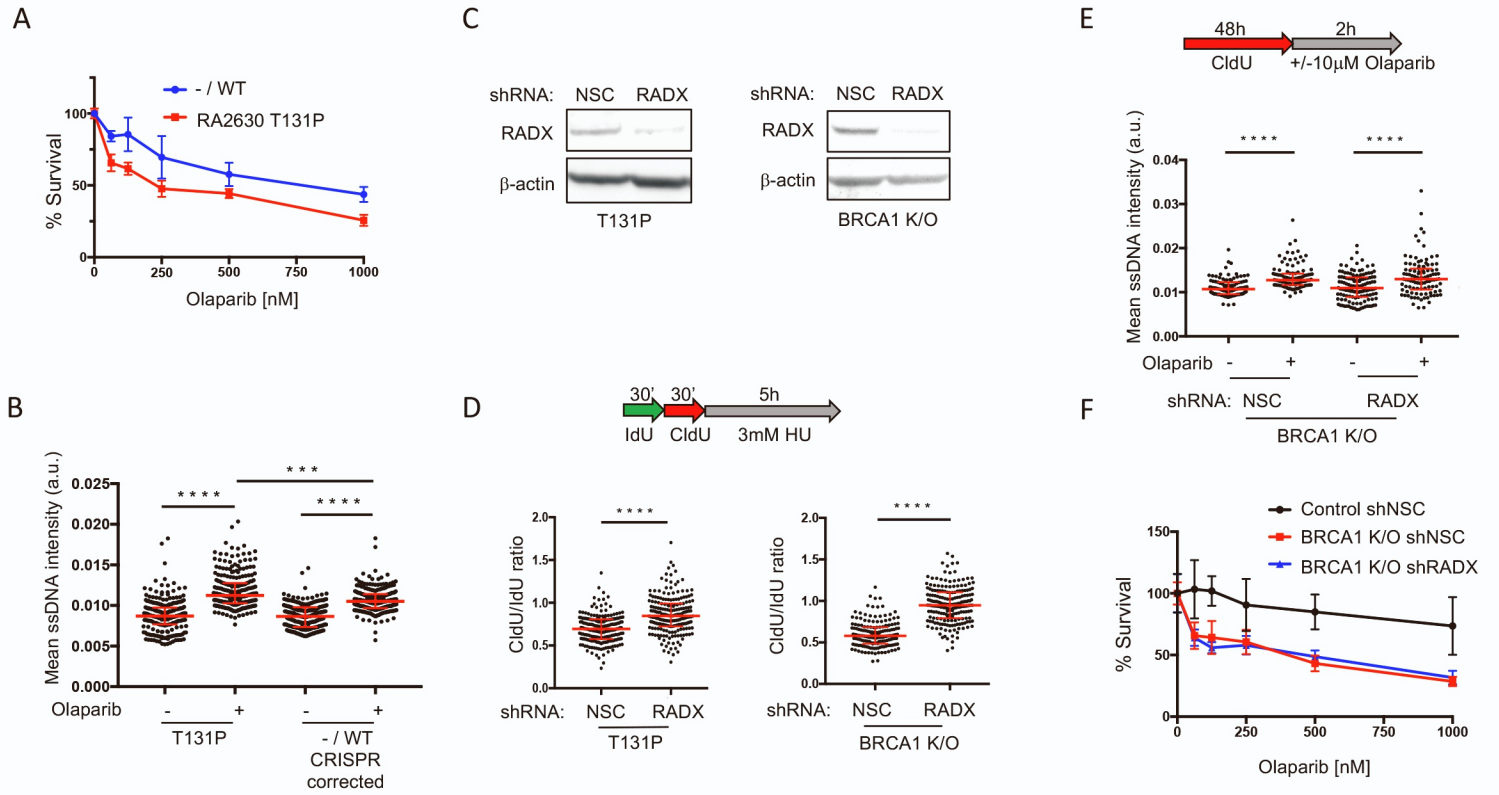

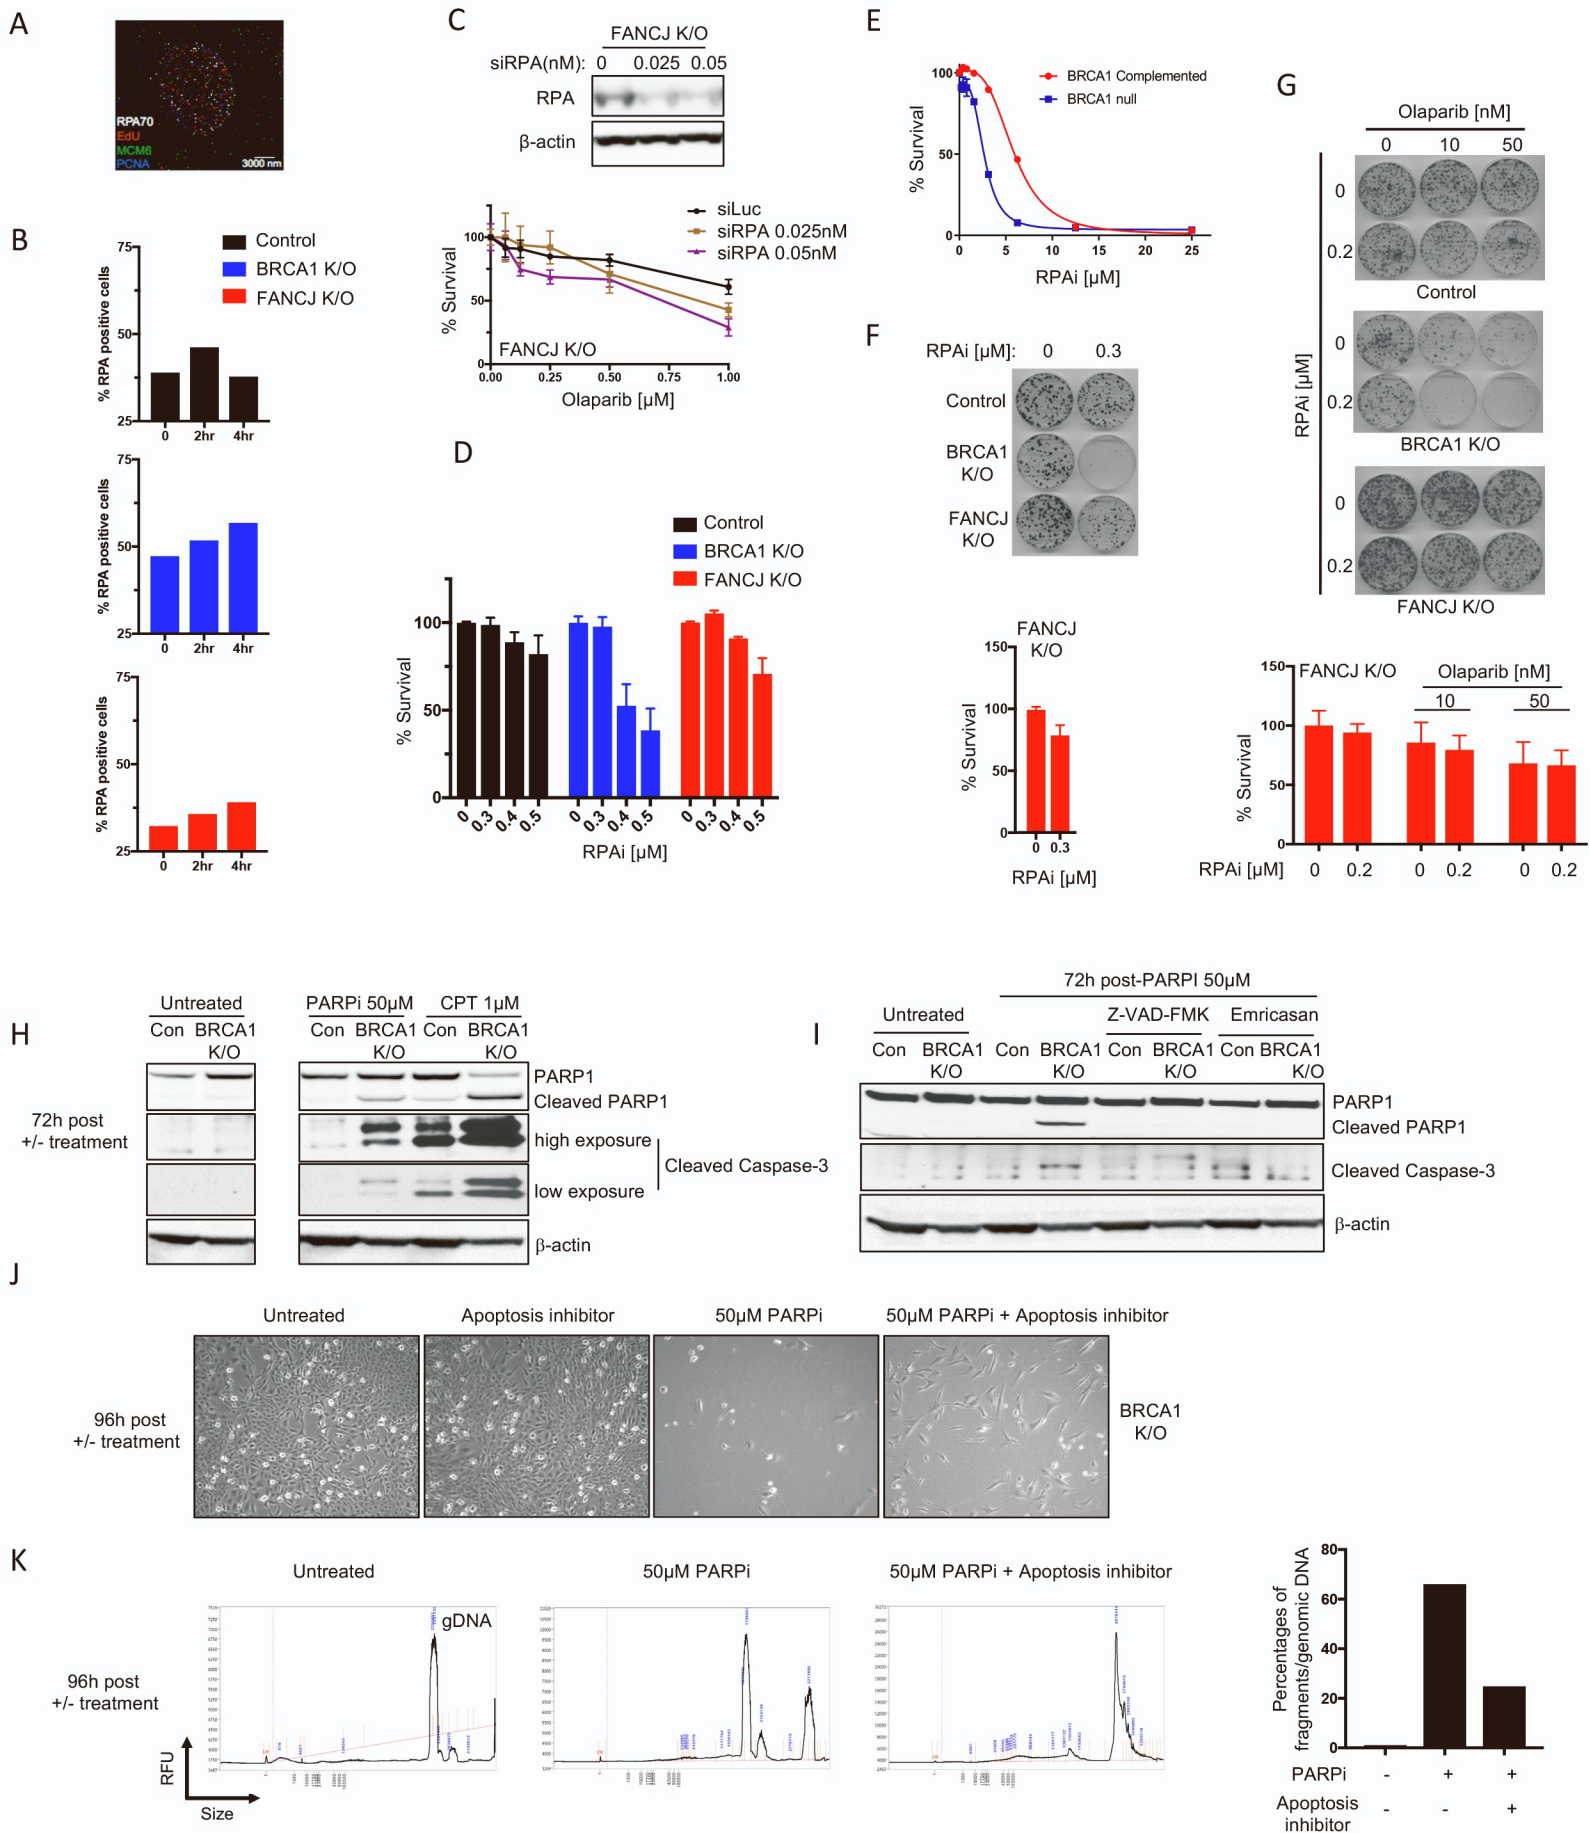

Figure S6

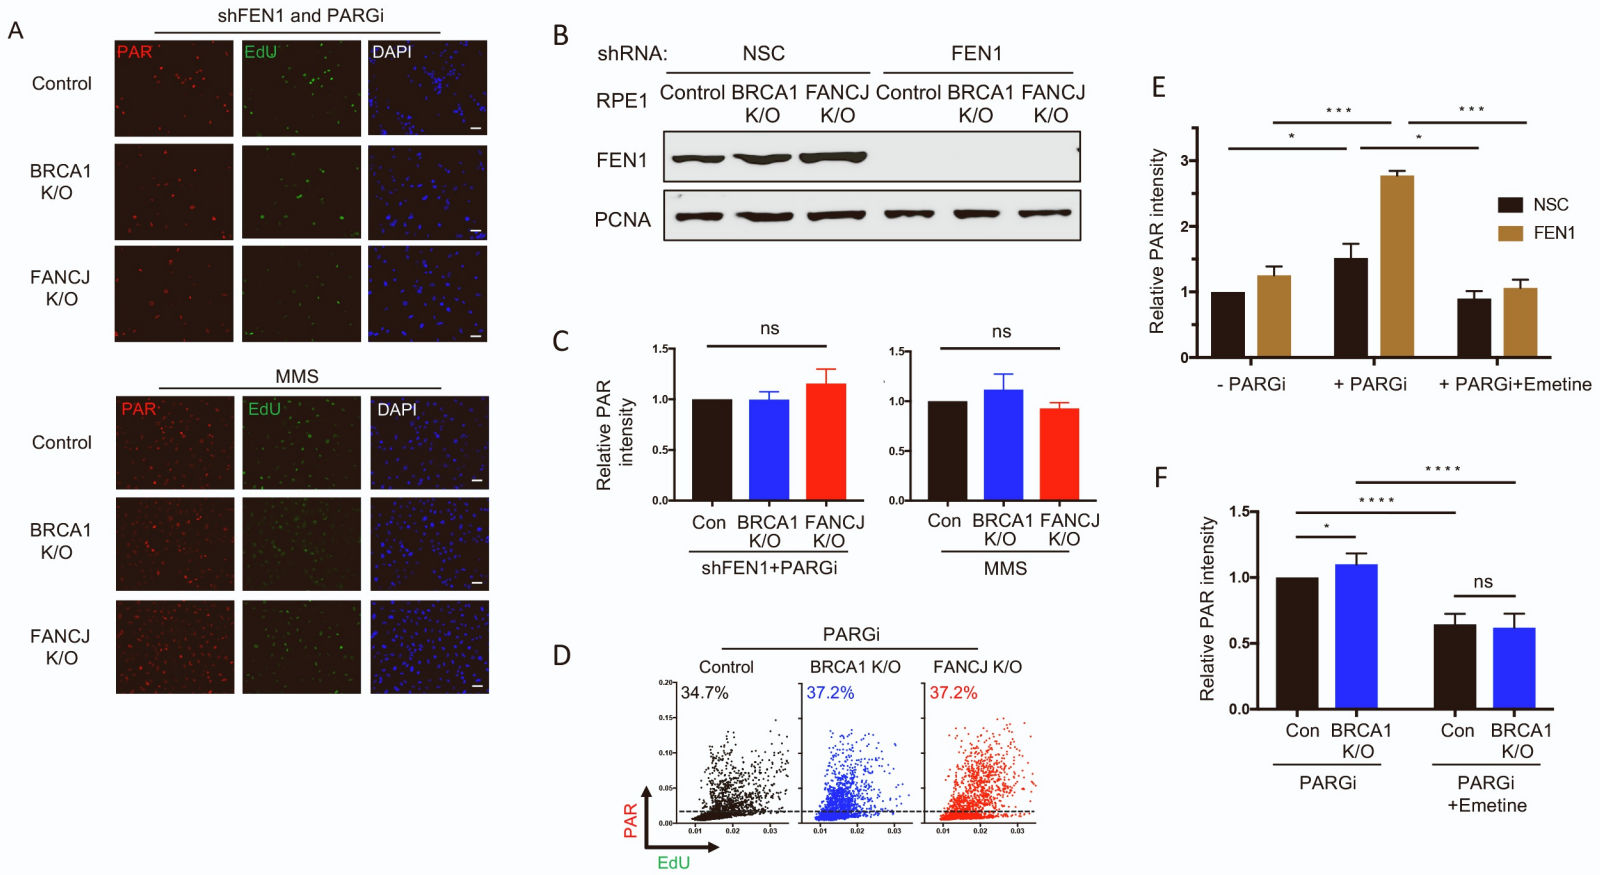

A

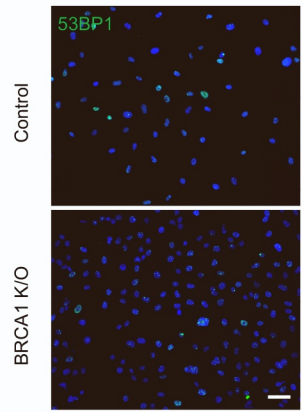

B

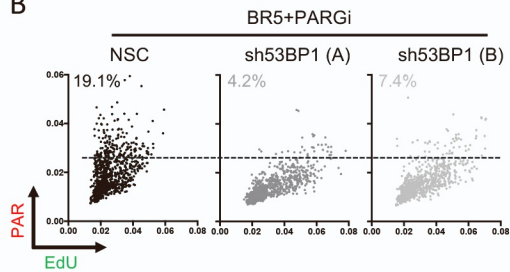

C

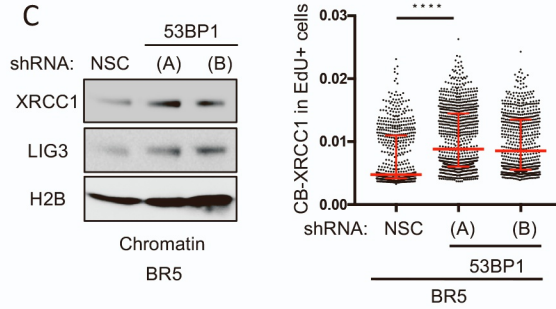

D

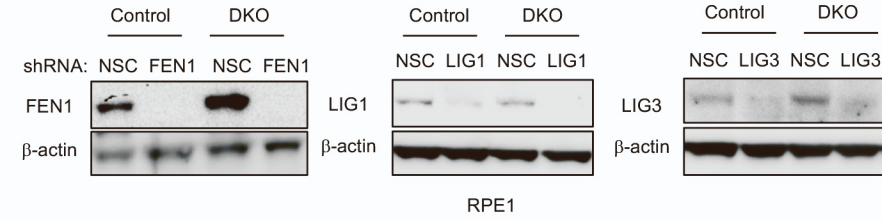

E

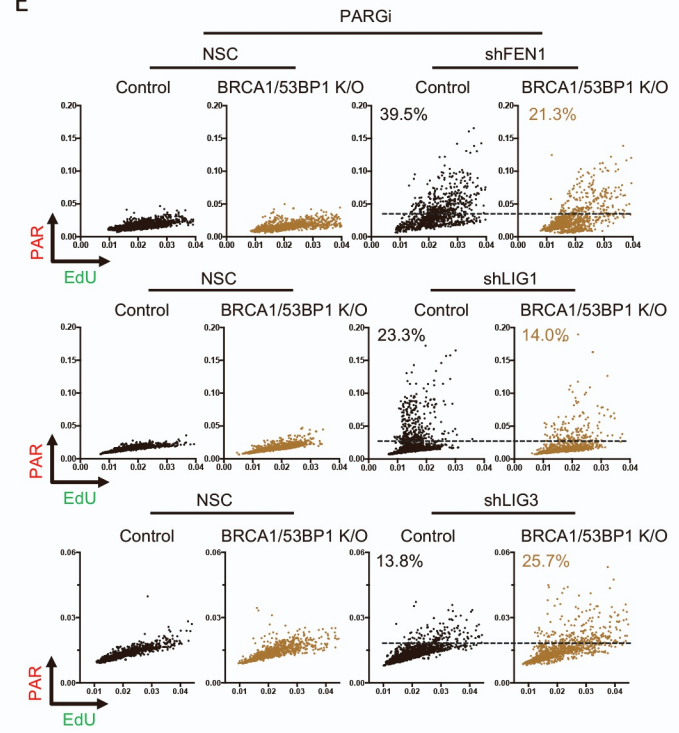



**Table S1**

| Cell line                             | HR* | FP* | GS* | PARPi response |
|---------------------------------------|-----|-----|-----|----------------|
| BRCA1/2 proficient                    | +   | +   | +   | resistant      |
| FANCD1 deficient                      | -   | -   | +   | resistant      |
| BRCA1 and 53BP1 deficient             | +   | -   | +   | resistant      |
| BRCA2 and CHD4 deficient              | -   | +   | +   | resistant      |
| BRCA2 S3291A mutant                   | +   | -   | +   | resistant      |
| BRCA1/2 deficient                     | -   | -   | -   | sensitive      |
| RAD51 T131P mutant                    | +   | -   | -   | sensitive      |
| RAD51 T131P mutant and RADX deficient | +   | +   | -   | sensitive      |
| BRCA1 and RADX deficient              | -   | +   | -   | sensitive      |

\* HR: homologous recombination, FP: fork protection, GS: gap suppression

Table S2

| REAGENT or RESOURCE                                 | SOURCE     | IDENTIFIER |
|-----------------------------------------------------|------------|------------|
| Oligonucleotides                                    |            |            |
| FANCJ CRISPR K/O gRNA #1: GGGTCGAGGAAAGGTAACGG      | This paper | N/A        |
| FANCJ CRISPR K/O gRNA #2: GGCAATCACCACACCCTTCA      | This paper | N/A        |
| shp21(CDKN1A): (A) 5'-TAAGGCAGAAGATGTAGAGCG-3'      | This paper | N/A        |
| shp21(CDKN1A): (B) 5'-AAAGTCGAAGTTCCATCGCTC-3'      | This paper | N/A        |
| sh53BP1 (TP53BP1): (A) 5'-AAACCAGTAAGACCAAGTATC-3'  | This paper | N/A        |
| sh53BP1 (TP53BP1): (B) 5'- AATCAATACTAATCACACTGG-3' | This paper | N/A        |
| shCHD4: 5'-AATTCATAGGATGTCAGCAGC-3';                | This paper | N/A        |
| shRADX(CXorf57): 5'-ATTTCCGTGGAATACTTTTCAG-3'       | This paper | N/A        |
| shFEN1: 5'-TACTCTCACAGTAGTCACTGC-3'                 | This paper | N/A        |
| shLIG1: 5'-TTCACGGACTCGAATAAACCG-3'                 | This paper | N/A        |
| shLIG3: 5'-AATGTAGTCCTTAAAGTGGGC-3'                 | This paper | N/A        |

## Supplemental Figure titles and legends

### **Figure S1: PARPi-induced fork lengthening and ssDNA gaps are enhanced in BRCA1-deficient cells and suppressed in FANCD1-deficient cells. Related to Figure 1.**

(A) Schematic and quantification of the ratio of IdU/CldU in Control and BRCA1 K/O RPE1 cells following olaparib treatment (10  $\mu$ M, 2 h).

(B) Cell survival assays for Control, FANCD1 K/O and BRCA1 K/O RPE1 cells under increasing concentrations of camptothecin (CPT). Data represent the mean percent  $\pm$  SD of survival for each dot.

(C) and (D) Western blot analysis with the indicated antibodies of lysates from Control, FANCD1 K/O U2OS cells (C) and 293T cells (D). Cell survival assays for indicated cells under increasing concentrations of olaparib and mitomycin C (MMC). Data represent the mean percent  $\pm$  SD of survival for each dot.

(E) Schematic and quantification of the length of dual-color tracts with or without S1 nuclease incubation in BRCA1 K/O RPE1 cells following olaparib treatment (0.5  $\mu$ M, 24 h). For (A), (B) and (F), each dot represents one fiber; at least 200 fibers are quantified from two biological independent experiments (n=2). Red bars represent the median. Statistical analysis according to Kruskal-Wallis test followed by Dunn's test. All p values are described in Statistical methods.

(F) Left: Treatment strategy and scheme for the non-denaturing immunofluorescence of mean ssDNA intensity per nucleus.

Middle: Representative images of ssDNA immunofluorescence for indicated cells following treatment. Scale bars, 50 $\mu$ m.

Right: Quantification of mean ssDNA intensity for indicated cells following CldU pre-labeling and olaparib release in 10  $\mu$ M, 2 h. At least 300 cells are quantified from n=3. Red bars represent the median  $\pm$  interquartile range, a.u. for arbitrary units. All statistical analysis according to Kruskal-Wallis test followed by Dunn's test. \*\*\*\*p < 0.0001, ns: not significant.

### **Figure S2: PARPi-induced fork lengthening and sensitivity are uncoupled. Related to Figure 2.**

(A) Western blot analysis with the indicated antibodies of lysates from U2OS cells expressing shRNA against non-silencing control (NSC), p21(A) and p21(B).

(B) Schematic and quantification of the length of CldU tracts in indicated U2OS cells following olaparib treatment (10  $\mu$ M, 2 h). Each dot represents one fiber; at least 200 fibers are quantified from two biological independent experiments (n=2).

(C) Cell survival assays for indicated U2OS cells under increasing concentrations of olaparib. Data represent the mean percent  $\pm$  SD of survival for each dot.

(D) Schematic and quantification of mean ssDNA intensity for indicated U2OS cells following CldU pre-labeling and olaparib release (10  $\mu$ M, 2 h). At least 200 cells are quantified from n=2. Red bars represent the median  $\pm$  interquartile range. Statistical analysis according to Kruskal-Wallis test followed by Dunn's test. All p values are described in Statistical methods.

**Figure S3: Survival, fork lengthening, and gap suppression in known and *de novo* models of PARPi resistance. Related to Figure 3.**

(A) Cell survival assays for T2, BR5 and BR5-R1 cells under increasing concentrations of cisplatin. Data represent the mean percent  $\pm$  SD of survival for each dot.

(B) Schematic and quantification of the length of IdU tracts in T2, BR5 and BR5-R1 following olaparib treatment (10  $\mu$ M, 2 h). Each dot represents one fiber; at least 200 fibers are quantified from two biological independent experiments (n=2).

(C) Cell survival assays for C4-2 and PEO1 cells under increasing concentrations of olaparib.

(D) Schematic and quantification of the length of dual-labeled tracts in PEO1 and C4-2 cells following olaparib treatment (1  $\mu$ M, 4 h). Each dot represents one fiber, at least 100 fibers are quantified for each.

(E) Schematic and quantification of mean ssDNA intensity for indicated cell lines following CldU pre-labeling and olaparib release (1  $\mu$ M, 4 h).

(F) Western blot analysis with the indicated antibodies of lysates from C4-2 NSC, PEO1 NSC and PEO1 shCHD4 cells.

(G) Cell survival assays for C4-2 NSC, PEO1 NSC and PEO1 shCHD4 cells under increasing concentrations of olaparib.

(H) Schematic and quantification of mean ssDNA intensity for PEO1 cells expressing shRNA against NSC and CHD4 following CldU pre-labeling and olaparib release (1  $\mu$ M, 4 h).

(I) Western blot analysis with the indicated antibodies of lysates from V-C8, V-C8+BRCA2 and V-C8+BRCA2 S3291A cells.

(J) Cell survival assays for V-C8, V-C8+BRCA2 and V-C8+BRCA2 S3291A cells under increasing concentrations of olaparib.

(K) Schematic and quantification of mean ssDNA intensity for V-C8 and indicated cells following CldU pre-labeling and olaparib release (1  $\mu$ M, 4 h).

(L) Western blot analysis with the indicated antibodies of lysates from Control, BRCA1 K/O and BRCA1/53BP1 K/O RPE1 cells.

(M) Western blot analysis for T2 and BR5 cells expressing shRNA against NSC, 53BP1(A) and 53BP1(B), and cell survival assays for indicated cells under increasing concentrations of olaparib.

(N) Schematic and quantification of mean ssDNA intensity for BR5 cells expressing shRNA against NSC, 53BP1(A) and 53BP1(B) following CldU pre-labeling and olaparib release (10  $\mu$ M, 2 h). All red bars represent the mean  $\pm$  interquartile range. For (E), (H), (K) and (N), at least 200 cells are quantified from n=2. Statistical analysis according to Kruskal-Wallis test followed by Dunn's test. All p values are described in Statistical methods.

**Figure S4: Gaps predict PARPi sensitivity in HR- and FP-proficient cells. Related to Figure 4.**

(A) Cell survival assays for patient fibroblasts (RA2630) RAD51 T131P (T131P/WT) and RAD51 single-allele CRISPR deleted cells (-/WT) under increasing concentrations of olaparib.

(B) Quantification of mean ssDNA intensity for indicated cell lines in (A) following CldU pre-labeling and olaparib release (10  $\mu$ M, 2 h), at least 200 cells are quantified from from two independent biological experiments (n=2).

(C) Western blot analysis with the indicated antibodies of lysates from patient fibroblasts (RA2630) RAD51 T131P cells and BRCA1 K/O RPE1 cells expressing shRNA against non-silencing control (NSC) and RADX.

(D) Schematic and quantification of the CldU/IdU ratio after 3 mM HU treatment for 5 h in indicated cells, at least 200 fibers are quantified from n=2.

(E) Schematic and quantification of mean ssDNA intensity for indicated cell lines following CldU pre-labeling and olaparib release (10  $\mu$ M, 2 h), at least 100 cells are quantified from n=2. All red bars represent the mean  $\pm$  interquartile range. Statistical analysis according to Kruskal-Wallis test followed by Dunn's test. All p values are described in Statistical methods.

(F) Cell survival assays for indicated cell lines under increasing concentrations of olaparib. For all cell survival assays, data represent the mean percent  $\pm$  SD of survival for each dot.

**Figure S5: PARPi synthetic lethality in BRCA1-deficient cells is augmented by targeting RPA and corresponds with apoptosis and DSB formation. Related to Figure 5.**

(A) Sample image for STORM analysis with staining of RPA70: white, EdU: red, MCM6: green, PCNA: blue. Scale bar, 3000nm.

(B) Bar graphs show percentages of RPA positive cells for different cells and treatments in Figure 5C.

(C) Western blot analysis and cell survival assays for FANCI K/O cells expressing indicated siRPA under increasing concentrations of olaparib.

(D) Cell survival assays for indicated cell lines with sensitivity normalized to untreated respectively at different concentrations of RPA inhibitor (0.3, 0.4, 0.5  $\mu$ M for NERx-329). For cell survival assays, data represent the mean percent  $\pm$  SD of survival for each bar.

(E) Sensitivity of BRCA1-deficient UWB1 and complemented ovarian cancer cell lines to RPA inhibitor NERx-329. Data represent the mean percent  $\pm$  SD of survival for each dot.

(F) Representative images and quantification for clonogenic assays with indicated cells treated with RPA inhibitor (RPAi, NERx-329) under indicated doses. Mean survival percentages of four biological independent experiments (n=4) with SEM are collected for all cells.

(G) Representative images and quantification for clonogenic assays for indicated cells under increasing olaparib with sublethal dose of RPA inhibitor (RPAi, NERx-329). Mean survival percentages of n=3 with SEM are collected for all cells.

(H) Apoptosis is induced in BRCA1 K/O cells by 72h post-PARPi (Olaparib, 50 $\mu$ M) and CPT (positive control, 1 $\mu$ M) as noted by cleavage of PARP1 and Caspase-3 by Western blot analysis.

(I) Apoptosis proteins in (H) are suppressed by apoptosis inhibitors Z-VAD-FMK (50 $\mu$ M) or Emricasan (50 $\mu$ M) with 2h pretreatment and maintained for the duration of the experiment (72h).

(J) Inhibition of apoptosis with Emricasan (50 $\mu$ M) enhances cell survival of BRCA1 K/O cells treated with PARPi (50 $\mu$ M).

(K) Pulsed field capillary electrophoresis analysis (left) and quantitation (right) for fragments of genome DNA (gDNA) after PARPi treatment in BRCA1 K/O cells reveal DNA fragmentation is suppressed by Emricasan (50 $\mu$ M). Left: X-axis: DNA sizes (base pair), Y-axis: Relative fluorescence units (RFU); purple numbers embedded indicate the sizes for each peak.

**Figure S6: Poly(ADP-ribose) validation for Okazaki fragment processing defects. Related to Figure 6.**

(A) Top: Representative images of immunofluorescence for shFEN1 Control, BRCA1 K/O and FANCD1 K/O RPE1 cells following PARG inhibitor (10  $\mu$ M) and EdU for 20min, stained for poly (ADP-ribose) (PAR) and EdU. Scale bars, 50 $\mu$ m. Bottom: Immunofluorescence images for Control, BRCA1 K/O and FANCD1 K/O RPE1 cells following MMS (0.2mg/ml) and EdU for 20min, stained for poly (ADP-ribose) (PAR) and EdU. Scale bars, 50 $\mu$ m.

(B) Western blot analysis with the indicated antibodies of lysates from Control, FANCD1 K/O and BRCA1 K/O RPE1 cells cells expressing shRNA against non-silencing control (NSC) and FEN1.

(C) Quantification of relative PAR intensity across indicated cells incubated with PARG inhibitor (10  $\mu$ M) or MMS (0.2 mg/ml) for 20min. Average values of five biological independent experiments (n=5) with SEM are calculated for all interphase cells.

(D) Quantification of immunofluorescence for shFEN1 Control, BRCA1 K/O and FANCD1 K/O RPE1 cells following PARG inhibitor (10  $\mu$ M) and EdU for 20min, stained for poly (ADP-ribose) (PAR) and EdU. Dashed lines indicate maximum PAR level in untreated Control cells. Cells higher than those are calculated for percentages respectively. Each dot represents one cell; at least 2000 cells are collected from n=5.

(E) Quantification of relative PAR intensity across indicated Control cells incubated with or not with emetine (10  $\mu$ M, 1 h), with or without PARG inhibitor (10  $\mu$ M) and EdU added during the final 20min. Average values of n=3 with SEM are calculated for all interphase cells.

(F) Quantification of relative PAR intensity for Control and BRCA1 K/O RPE1 cells incubated with or without emetine (10  $\mu$ M, 1 h), with PARG inhibitor (10  $\mu$ M) and EdU added during the final 20min. Average values of n=5 with SEM are calculated for all interphase cells. For (C), (E) and (F), at least 200 cells are measured for each experiment. Statistical analysis according to t test, all p values are described in Statistical methods.

**Figure S7: Analysis for 53BP1 depletion and alternative OFP. Related to Figure 7.**

(A) Representative images (20x) for 53BP1 chromatin foci in untreated Control and BRCA1 K/O RPE1 cells. More cells with  $\geq 1$  foci can be observed in BRCA1 K/O cells. Scale bar, 50 $\mu$ m.

(B) Mean PAR and EdU intensity per nucleus for indicated cells were measured after PARP inhibitor (10  $\mu$ M, 20min) and EdU incubation. For quantification, PAR positive cells were gated by maximum PAR level of untreated BR5 cells in Figure 6B. Each dot represents one cell; at least 800 cells are collected from two biological independent experiments (n=2) for each.

(C) Left: Western blot analysis for indicated antibodies in chromatin extraction from untreated BR5 cells expressing shRNA against NSC, 53BP1(A) and 53BP1(B).

Right: Quantification of CB-XRCC1 for untreated BR5 cells expressing shRNA against NSC, 53BP1(A) and 53BP1(B) with EdU incubated for 20min. For quantification, EdU+ cells were gated according to positive EdU incorporation. At least 600 cells are quantified from n=2 for each. Bars represent the median  $\pm$  interquartile range. Statistical analysis according to Kruskal-Wallis test followed by Dunn's test. \*\*\*\*p < 0.0001.

(D) Western blot analysis in Control and BRCA1/53BP1 K/O (DKO) RPE1 cells expressing shRNA against NSC, FEN1, LIG1 and LIG3.

(E) Mean PAR and EdU intensity per nucleus for indicated cells were measured after PARP inhibitor (10  $\mu$ M, 20min) and EdU incubation. For quantification, PAR positive cells were gated by mean maximum PAR level in Control NSC cells. Each dot represents one cell; at least 800 cells are collected from n=4 for each.

**Table S1. PARPi response in different genetic backgrounds. Related to Figures 1, 3 and 4.**

**Table S2. Sequences of CRISPR guides and shRNAs. Related to Oligonucleotides in KEY RESOURCES TABLE.**
